# Supplementary material for: Comprehensive single cell analysis of pandemic influenza A virus infection in the human airways uncovers cell-type specific host transcriptional signatures relevant for disease progression and pathogenesis
Source: bioRxiv or medRxiv preprint supplement (doi:10.1101/2020.04.03.014282), 2020-04-04
Supplement: Supplementary file [file media-2.pdf]

Cell population

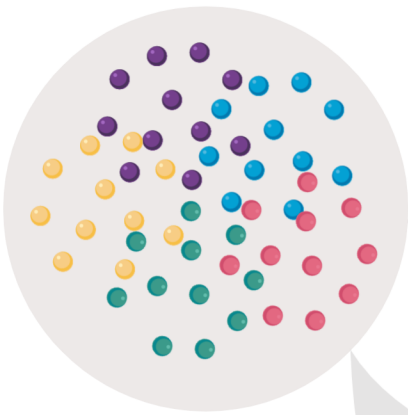

Cell type

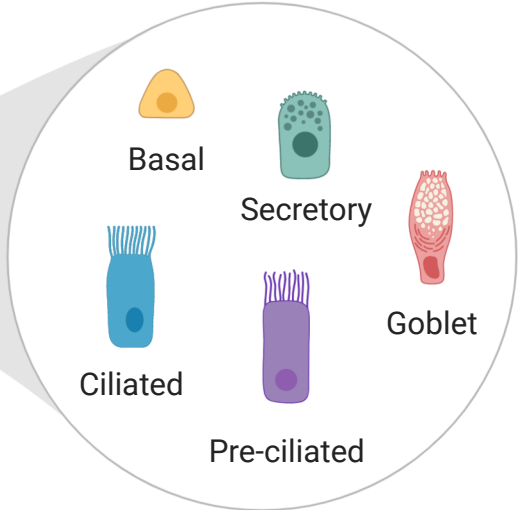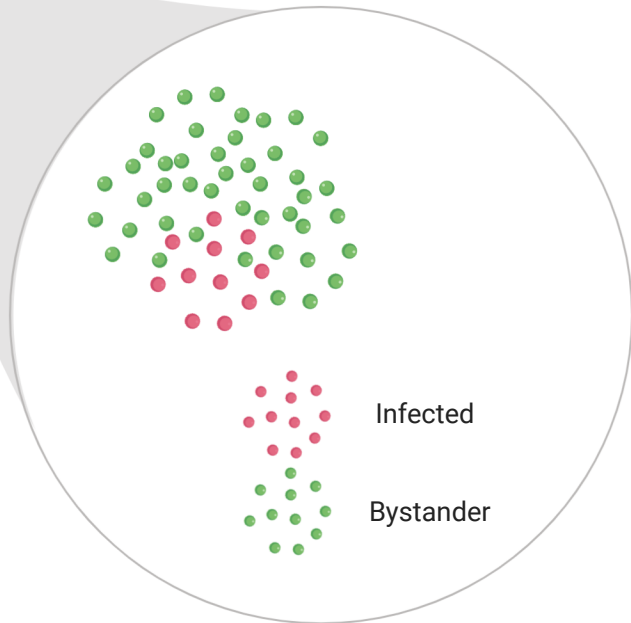

Infected vs. Bystander
